# Supplementary material for: Next-Generation Sequencing and In Vitro Expression Study of ADAMTS13 Single Nucleotide Variants in Deep Vein Thrombosis
Source: PLOS journal article supplement (doi:10.1371/journal.pone.0165665), 2016-11-01

**Fig. S1. Flow chart of *in vitro* expression studies.**

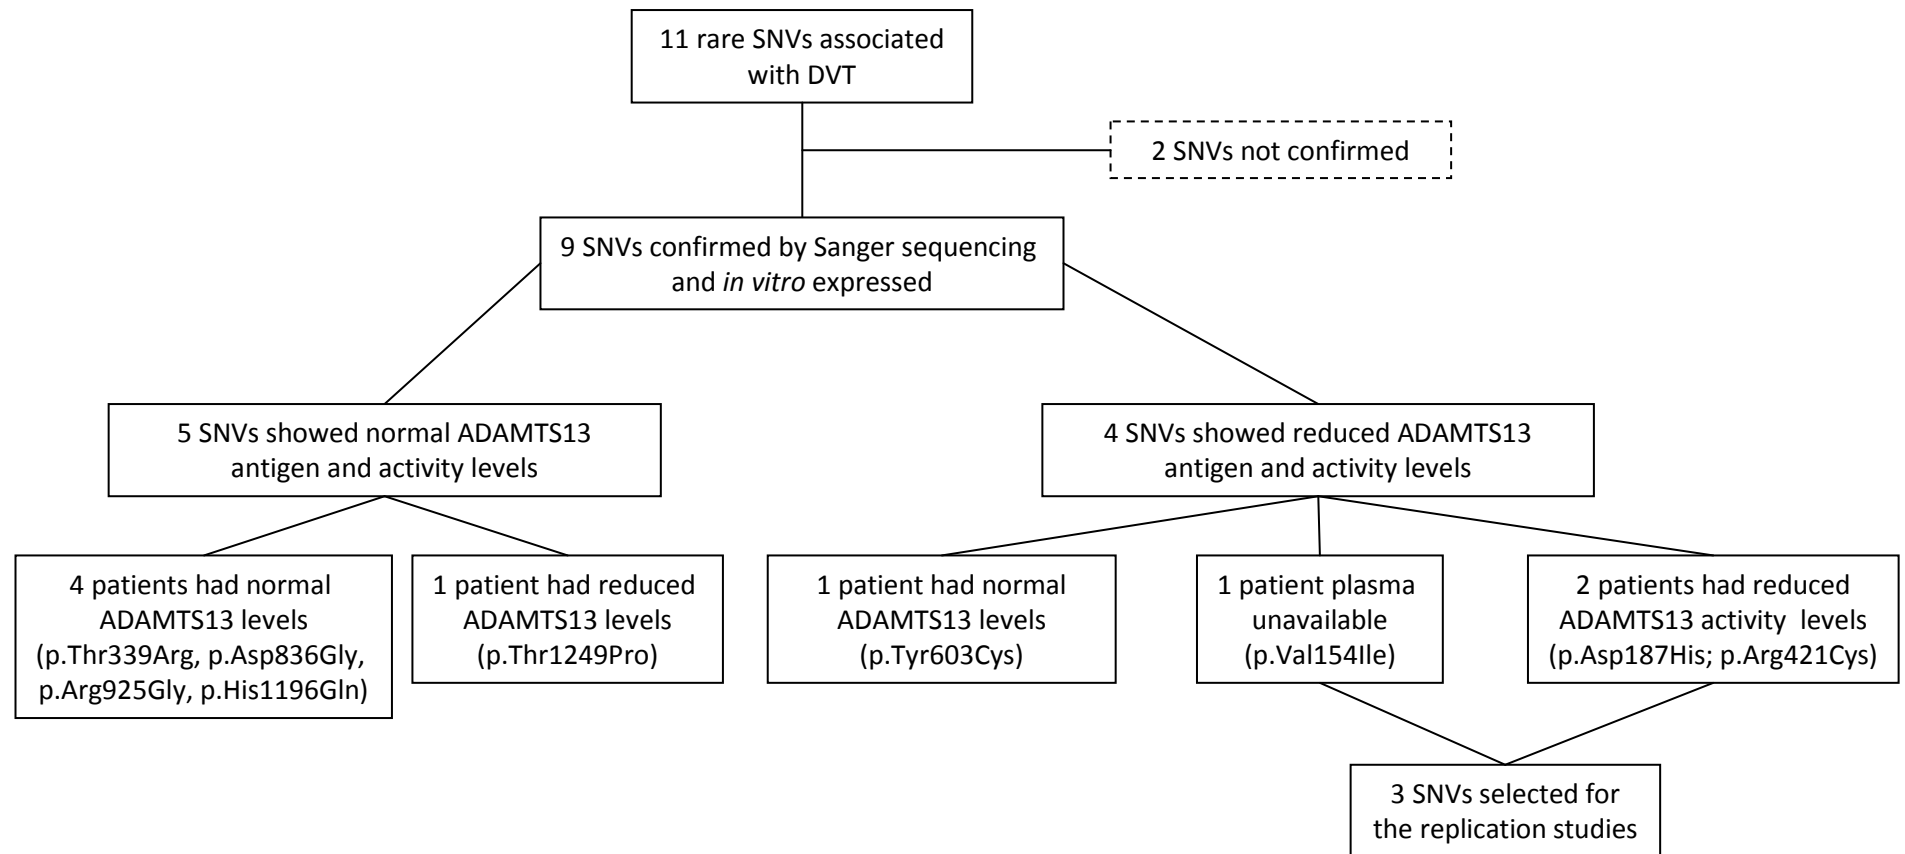

Supplement: S1 (10.1371/journal.pone.0165665.s001) [file journal.pone.0165665.s001]
